# Supplementary material for: Association between baseline serum glucose, triglycerides and total cholesterol, and prostate cancer risk categories
Source: PubMed Central journal article supplement (PMC4924389; doi:10.1002/cam4.665), 2016-02-29
Supplement: CAM4-5-1307-s001.pdf [file CAM4-5-1307-s001.pdf]

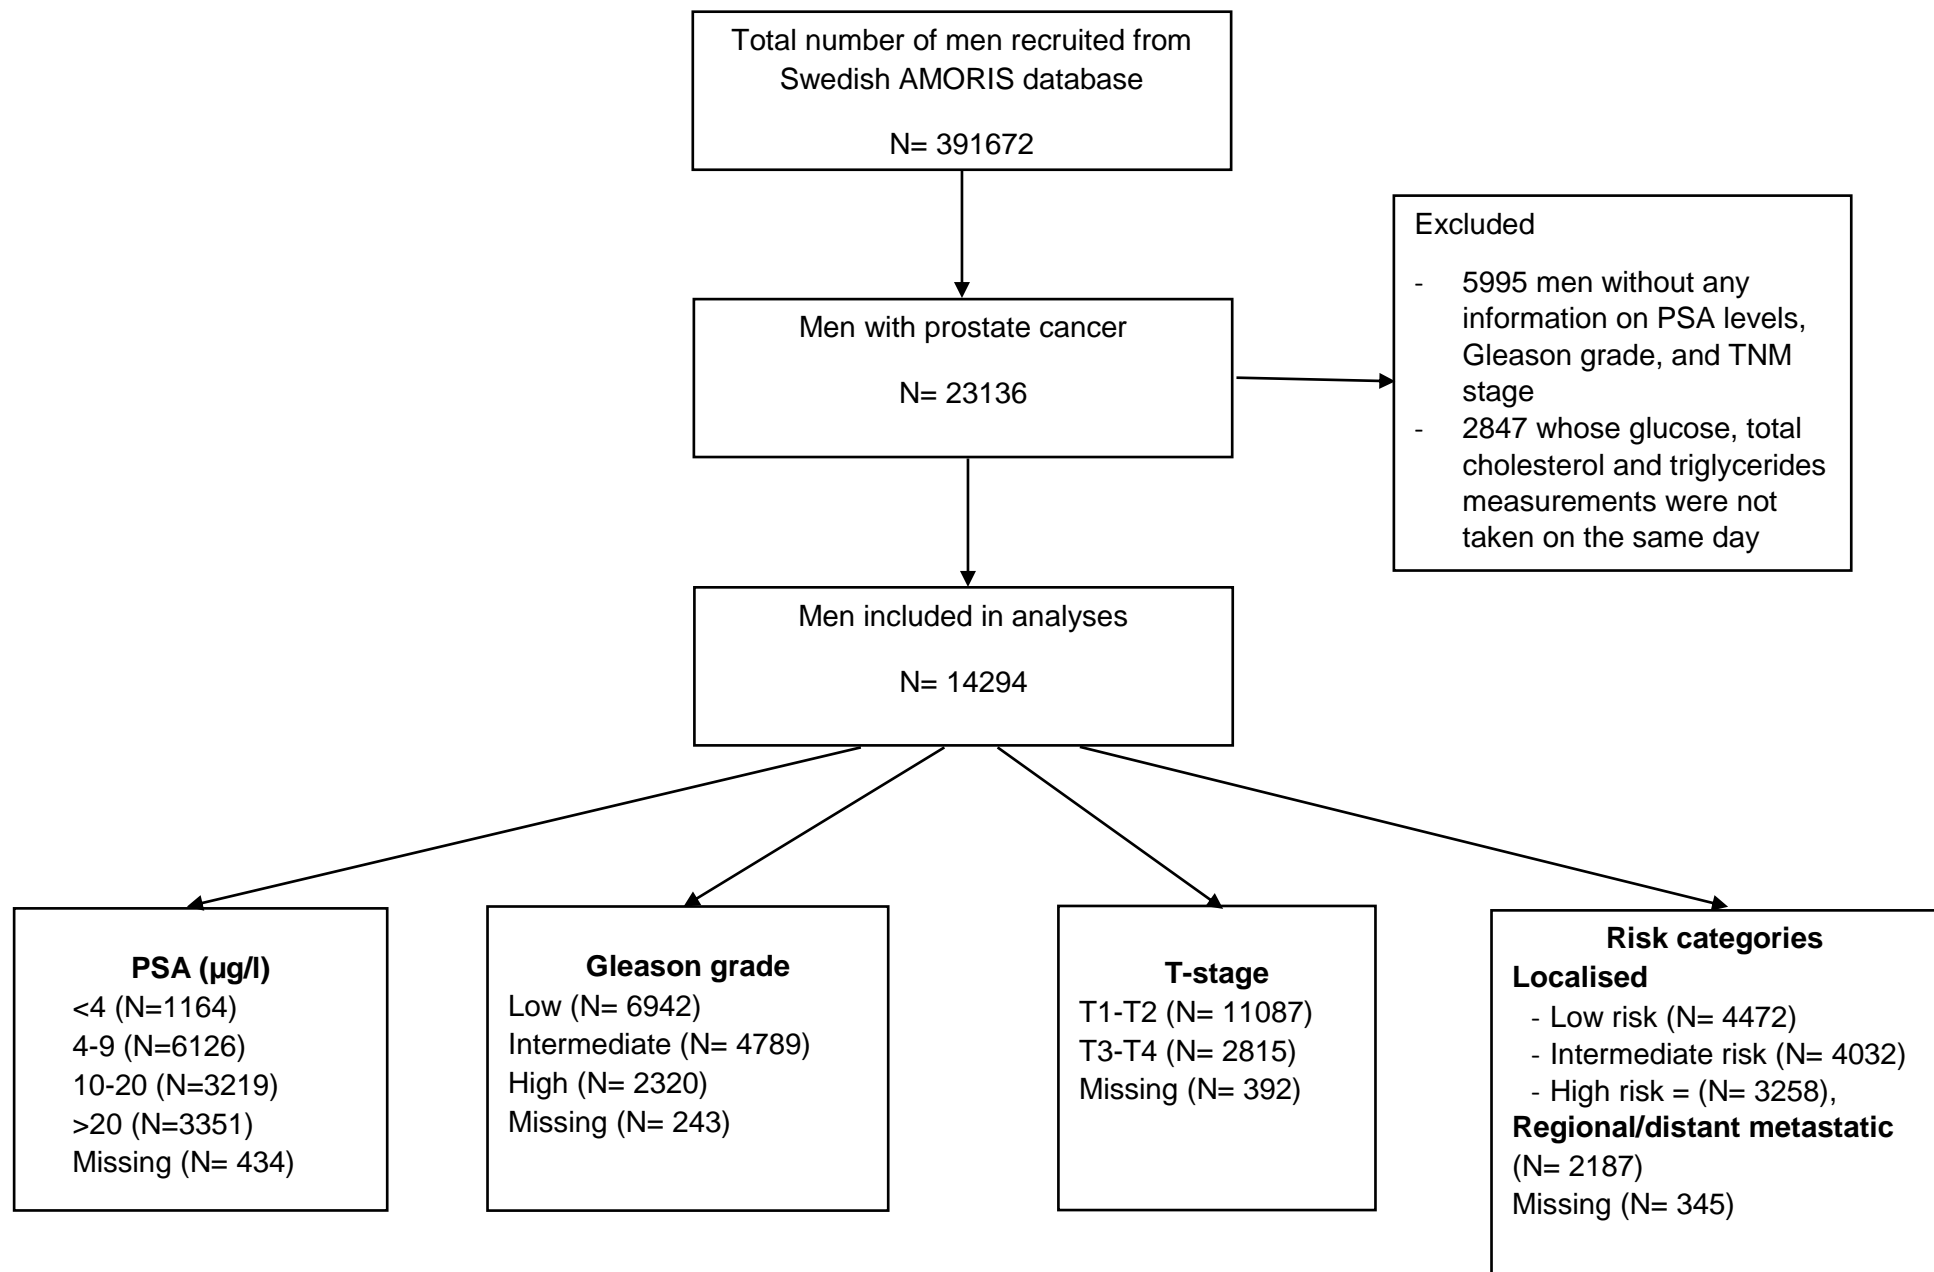

**Figure S1: Schematic representation of study population**
